# Supplementary material for: Entropically driven melting of Cu-based 1D coordination polymers
Source: Royal Society of Chemistry journal article supplement (doi:10.1039/d4cc02925a), 2024-01-01
Supplement: d4cc02925a1.pdf [file d4cc02925a1.pdf]

## *Supporting Information for*

# **Entropically-driven Melting of Cu-based 1D Coordination**

## **Polymers**

Yuki Ohara<sup>a</sup>, Taichi Nishiguchi<sup>a</sup>, Xin Zheng<sup>b</sup>, Shin-ichiro Noro<sup>b</sup>, Daniel Packwood,<sup>c</sup>  
Satoshi Horike<sup>c,d,e</sup>

<sup>a</sup>Department of Synthetic Chemistry and Biological Chemistry, Graduate School of Engineering, Kyoto University, Katsura, Nishikyo-ku, Kyoto 615-8510, Japan

<sup>b</sup>Graduate School of Environmental Science, Hokkaido University, Sapporo 060-0810, Japan

<sup>c</sup>Institute for Integrated Cell-Material Sciences, Institute for Advanced Study, Kyoto University, Yoshida-Honmachi, Sakyo-ku, Kyoto 606-8501, Japan

<sup>d</sup>Department of Chemistry, Graduate School of Science, Kyoto University, Kitashirakawa-Oiwakecho, Sakyo-ku, Kyoto 606-8502, Japan

<sup>e</sup>Department of Materials Science and Engineering, School of Molecular Science and Engineering, Vidyasirimedhi Institute of Science and Technology, Rayong, 21210, Thailand

### **Synthesis of crystalline powders of Cu(A)<sub>2</sub>(L)<sub>2</sub>**

All chemicals and solvents used in the synthesis were of reagent grade and used without further purification.

#### **Cu(TFSI)<sub>2</sub>(bpp)<sub>2</sub>**

Crystalline powders were synthesized according to the previous report.<sup>1</sup>

#### **Cu(Ms<sub>2</sub>N)<sub>2</sub>(bpp)<sub>2</sub>**

Crystalline powders were synthesized according to the previous report.<sup>1</sup>

#### **Cu(TFSI)<sub>2</sub>(bpe)<sub>2</sub>**

Crystalline powders were synthesized as follows: 20 mmol HTFSI and 10 mmol Cu(OH)<sub>2</sub> were mixed in 100 ml H<sub>2</sub>O and stirred at room temperature for 1 h. The mixture were evaporated, and dried at 80 °C for 6 h under vacuum, then blue powders were obtained. The obtained blue powders were dissolved in H<sub>2</sub>O, then 50mL 0.1 M Cu(TFSI)<sub>2</sub> aqueous solution was prepared. The solution was mixed with 50 mL 0.2 M bpp MeOH solution, and stirred at room temperature for 2 h. The purple precipitates were filtered and washed with MeOH, then dried at 80°C for 6 h under vacuum. Single

crystal of  $\text{Cu}(\text{TFSI})_2(\text{bpe})_2$  was synthesized as follows: Purple single crystals were collected.

### **$\text{Cu}(\text{BF}_4)_2(\text{bpp})_2$**

Crystalline powders were synthesized according to the previous report.<sup>2</sup>

### **Single crystal X-ray diffraction and structure analysis**

Single crystal X-ray diffraction measurements were performed using a Rigaku Micro Max-007 HF diffractometer and a Pilatus 200 K detector with Cu  $K\alpha$  radiation ( $\lambda = 1.54184 \text{ \AA}$ ) at 173 K. The crystal structures were solved by using direct method (SHELXT)<sup>3</sup> and refined by using full-matrix least-squares techniques on  $F^2$  using SHELXL-2018 (ver. 2018/3).<sup>4</sup>

### **Powder X-ray diffraction**

Powder X-ray diffraction (PXRD) patterns were collected on a Rigaku SmartLab diffractometer with  $\text{CuK}\alpha$  radiation ( $\lambda = 1.54 \text{ \AA}$ ).

### **Elemental analysis**

CHN elemental analysis was conducted on a MICRO CORDER JM11 (J-Science Lab Co., Ltd.).

### **Thermal property measurements**

Thermogravimetry-differential thermal analysis (TG-DTA) was performed using a Rigaku Thermo plus TG 8120 apparatus in the temperature range between 25 and 500 °C with Ar gas flow (50-60 mL  $\text{min}^{-1}$ ) and at the heating rate of 10 °C  $\text{min}^{-1}$ . Differential scanning calorimetry (DSC) was carried out with a Hitachi DSC7200 at the heating rate of 10 °C  $\text{min}^{-1}$ . Sample preparations for DSC were conducted under Ar. The  $\Delta H_{\text{fus}}$  was calculated as an amount per sample weight by integrating the endothermic peak in the 1st heating of DSC profile, then converted to per molecular weight. Determination of  $T_m$  and peak integration were performed using the analysis software supplied with the equipment (Hitachi High-Tech NEXTA software).

### **Variable temperature Powder X-ray diffraction (VT-PXRD)**

VT-PXRD patterns were collected on a Rigaku SmartLab diffractometer with  $\text{CuK}\alpha$  radiation ( $\lambda = 1.54 \text{ \AA}$ ) at temperatures between 30°C and 210°C for  $\text{Cu}(\text{TFSI})_2(\text{bpp})_2$  and between 30°C and 180°C for  $\text{Cu}(\text{Ms}_2\text{N})_2(\text{bpp})_2$ , with  $\text{N}_2$  gas flow (20 mL  $\text{min}^{-1}$ ).

### **Variable temperature X-ray absorption spectroscopy (XAS)**

Cu K-edge X-ray absorption spectroscopy (XAS) including X-ray absorption near

edge structure (XANES) and extended X-ray absorption fine structure (EXAFS) regions were performed in the transmission mode at BL14B2 beamline at SPring-8. Cu foil internal energy calibration was carried out before sample measurements. The sample was pelletized with boron nitride powder prior to the measurement. The temperature-dependent XAS study was performed by heating the sample under N<sub>2</sub>. Variable temperature radial distribution function (VT-RDF) profiles were obtained from the analysis of EXAFS spectra by using Artemis software.<sup>5</sup>

### Density functional theory (DFT) calculations

DFT calculations were performed using the Vienna Ab initio Simulation Package (VASP),<sup>6</sup> using the projector augmented wave method (PAW) with a plane-wave basis set.<sup>7</sup> The rev-vdW-DF2 exchange-correlation functional<sup>8</sup> was used. The cutoff energy of 600 eV was used with a  $3 \times 2 \times 1$   $\Gamma$ -centered k-point mesh. Gaussian smearing was employed with  $\sigma = 0.05$  eV. The energy convergence threshold is set as  $10^{-5}$  eV.  $2 \times 2 \times 2$  supercells were generated from the relaxed structures and used for calculation of chain-chain interaction ( $E_{\text{chain-chain}}$ ).  $E_{\text{chain-chain}}$  was computed as the energy difference per mole between isolated 1D chains ( $E_{\text{chain}}$ ) and the crystal containing the same number of chains ( $E_{\text{crystal}}$ ):

$$E_{\text{chain-chain}} = (E_{\text{crystal}} - n E_{\text{chain}})/(2n)$$

where  $n$  is the number of chains in the crystal. In all cases, the supercells of crystal contains 8 chains ( $n = 8$ ). As an example, the supercell of crystal and the isolated 1D chain of Cu(TFSI)<sub>2</sub>(bpp)<sub>2</sub> are shown in Figure S5.  $E_{\text{chain}}$  and  $E_{\text{crystal}}$  were calculated by DFT in corresponding simulation cells with the same level of theory but without structural relaxation. Calculated  $E_{\text{chain}}$ ,  $E_{\text{crystal}}$  and  $E_{\text{chain-chain}}$  in each compound are shown in Table S2.

### Discussion on the thermodynamic parameters in Cu(TFSI)<sub>2</sub>(bpp)<sub>2</sub> and Cu(BF<sub>4</sub>)<sub>2</sub>(bpp)<sub>2</sub>

Based on the discussion on the case of Cu(TFSI)<sub>2</sub>(bpp)<sub>2</sub> and Cu(Ms<sub>2</sub>N)<sub>2</sub>(bpp)<sub>2</sub> or Cu(TFSI)<sub>2</sub>(bpe)<sub>2</sub>, the more complex cases of Cu(TFSI)<sub>2</sub>(bpp)<sub>2</sub> ( $T_m = 196^\circ\text{C}$ ) and Cu(BF<sub>4</sub>)<sub>2</sub>(bpp)<sub>2</sub> (no melting) were investigated. For  $E_{\text{ionic}}$ , Cu(BF<sub>4</sub>)<sub>2</sub>(bpp)<sub>2</sub> is expected to have a larger  $E_{\text{ionic}}$  than Cu(TFSI)<sub>2</sub>(bpp)<sub>2</sub> due to the smaller size of BF<sub>4</sub><sup>-</sup>.<sup>9</sup>  $E_{\text{chain-chain}}$ , on the other hand, is 33 kJ mol<sup>-1</sup> larger for Cu(TFSI)<sub>2</sub>(bpp)<sub>2</sub> (Table 2). It is not possible to claim a larger or smaller relationship for  $\Delta H_{\text{fus}}$  due to the opposite trend in  $E_{\text{ionic}}$  and  $E_{\text{chain-chain}}$ . For  $S_{\text{kin}}$ , based on the  $E_{\text{chain-chain}}$  values,  $S_{\text{kin}}$  in the crystal was expected to be smaller for Cu(TFSI)<sub>2</sub>(bpp)<sub>2</sub>. In terms of  $S_{\text{confor}}$ , TFSI<sup>-</sup> can adopt multiple

conformations whereas  $\text{BF}_4^-$  adopts only a single conformation.  $S_{\text{confor}}$  in the liquid phase is expected to be larger for  $\text{Cu}(\text{TFSI})_2(\text{bpp})_2$ . For these reasons,  $\Delta S_{\text{fus}}$  was expected to be higher in  $\text{Cu}(\text{TFSI})_2(\text{bpp})_2$  than in  $\text{Cu}(\text{BF}_4)_2(\text{bpp})_2$ . Considering that the effect of  $\Delta H_{\text{fus}}$  derived from  $E_{\text{ionic}}$  and  $E_{\text{chain-chain}}$  is small in this structural system, suggested in the study in other compounds, the effect of  $\Delta S_{\text{fus}}$  increase is considered dominant in the  $T_m$  decrease in  $\text{Cu}(\text{TFSI})_2(\text{bpp})_2$ .

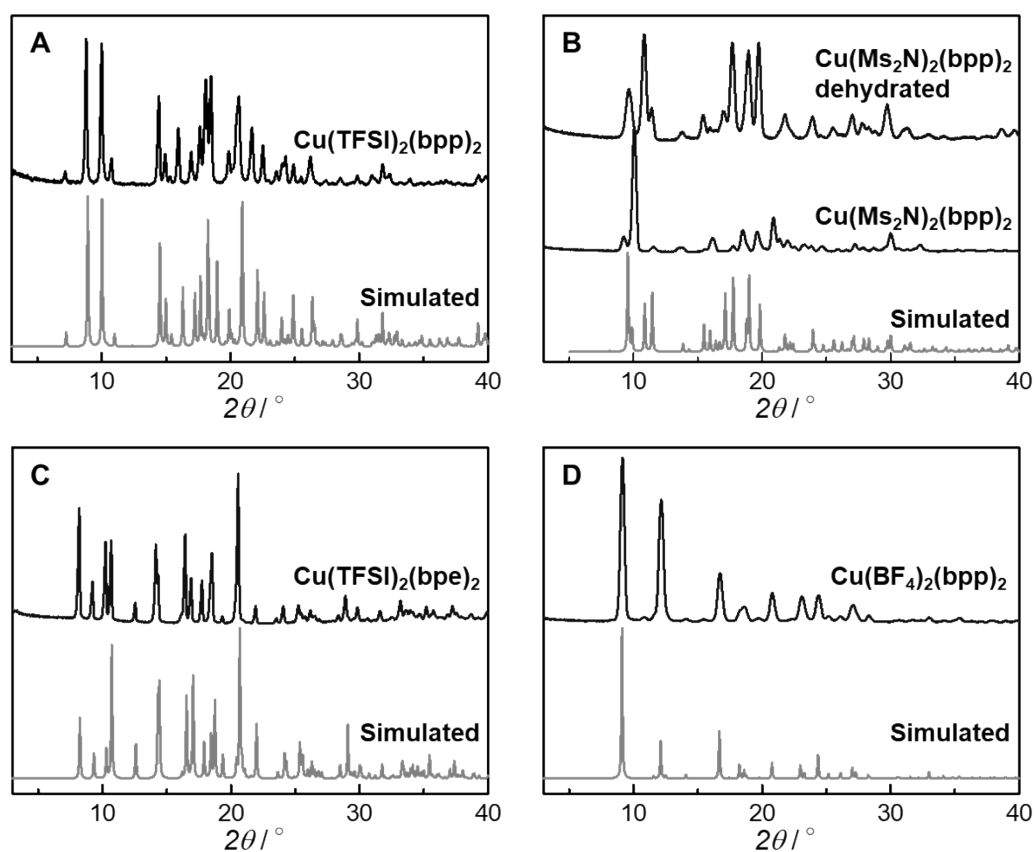

**Figure S1.** PXRD patterns of simulated and as-synthesized or degassed (A)  $\text{Cu}(\text{TFSI})_2(\text{bpp})_2$ , (B)  $\text{Cu}(\text{Ms}_2\text{N})_2(\text{bpp})_2$ , (C)  $\text{Cu}(\text{TFSI})_2(\text{bpe})_2$  and (D)  $\text{Cu}(\text{BF}_4)_2(\text{bpp})_2$ . For the dehydrated form of  $\text{Cu}(\text{Ms}_2\text{N})_2(\text{bpp})_2$ , the sample was degassed at  $100^\circ\text{C}$  and measured under inert atmosphere.

**Table S1.** Elemental analysis.

| Compound                                         | H (calcd) | H (found) | C (calcd) | C (found) | N (calcd) | N (found) |
|--------------------------------------------------|-----------|-----------|-----------|-----------|-----------|-----------|
|                                                  | /%        | /%        | /%        | /%        | /%        | /%        |
| $\text{Cu}(\text{TFSI})_2(\text{bpp})_2$         | 2.77      | 2.70      | 35.31     | 35.11     | 8.24      | 8.43      |
| $\text{Cu}(\text{Ms}_2\text{N})_2(\text{bpp})_2$ | 5.01      | 4.90      | 44.79     | 44.56     | 10.45     | 10.40     |
| $\text{Cu}(\text{TFSI})_2(\text{bpe})_2$         | 4.45      | 4.40      | 49.28     | 49.45     | 8.84      | 8.66      |
| $\text{Cu}(\text{BF}_4)_2(\text{bpp})_2$         | 2.44      | 2.39      | 33.89     | 33.73     | 8.47      | 8.26      |

**Table S2.** Parameters of crystal structures of Cu(TFSI)<sub>2</sub>(bpe)<sub>2</sub>. CCDC deposited number is #2321776.

|                                                                                 |                                                                                                              |
|---------------------------------------------------------------------------------|--------------------------------------------------------------------------------------------------------------|
| <b>Compound</b>                                                                 | Cu(TFSI) <sub>2</sub> (bpe) <sub>2</sub>                                                                     |
| <b>Formula</b>                                                                  | C <sub>28</sub> H <sub>24</sub> Cu <sub>6</sub> F <sub>12</sub> N <sub>6</sub> O <sub>8</sub> S <sub>4</sub> |
| <b>MW (g/mol)</b>                                                               | 992.31                                                                                                       |
| <b><i>T</i> (K)</b>                                                             | 173                                                                                                          |
| <b>Wavelength (Å)</b>                                                           | 1.54187                                                                                                      |
| <b>Crystal system</b>                                                           | Monoclinic                                                                                                   |
| <b>Space group</b>                                                              | <i>C</i> 2                                                                                                   |
| <b><i>a</i> (Å)</b>                                                             | 19.966(6)                                                                                                    |
| <b><i>b</i> (Å)</b>                                                             | 9.159(2)                                                                                                     |
| <b><i>c</i> (Å)</b>                                                             | 11.301(4)                                                                                                    |
| <b><i>β</i> (Å)</b>                                                             | 108.602(9)                                                                                                   |
| <b><i>V</i> (Å<sup>3</sup>)</b>                                                 | 1958.6(10)                                                                                                   |
| <b><i>Z</i></b>                                                                 | 2                                                                                                            |
| <b><i>ρ</i> (g cm<sup>-3</sup>)</b>                                             | 1.683                                                                                                        |
| <b><i>μ</i> (mm<sup>-1</sup>)</b>                                               | 3.812                                                                                                        |
| <b>Number of collected/independent reflection</b>                               | 3438/3018                                                                                                    |
| <b><i>R</i><sub>1</sub>, <i>wR</i><sub>2</sub> [<i>I</i> &gt; 2σ(<i>I</i>)]</b> | 0.0278, 0.0592                                                                                               |
| <b><i>R</i><sub>1</sub>, <i>wR</i><sub>2</sub> (all data)</b>                   | 0.0330, 0.0602                                                                                               |
| <b>GOF</b>                                                                      | 0.945                                                                                                        |

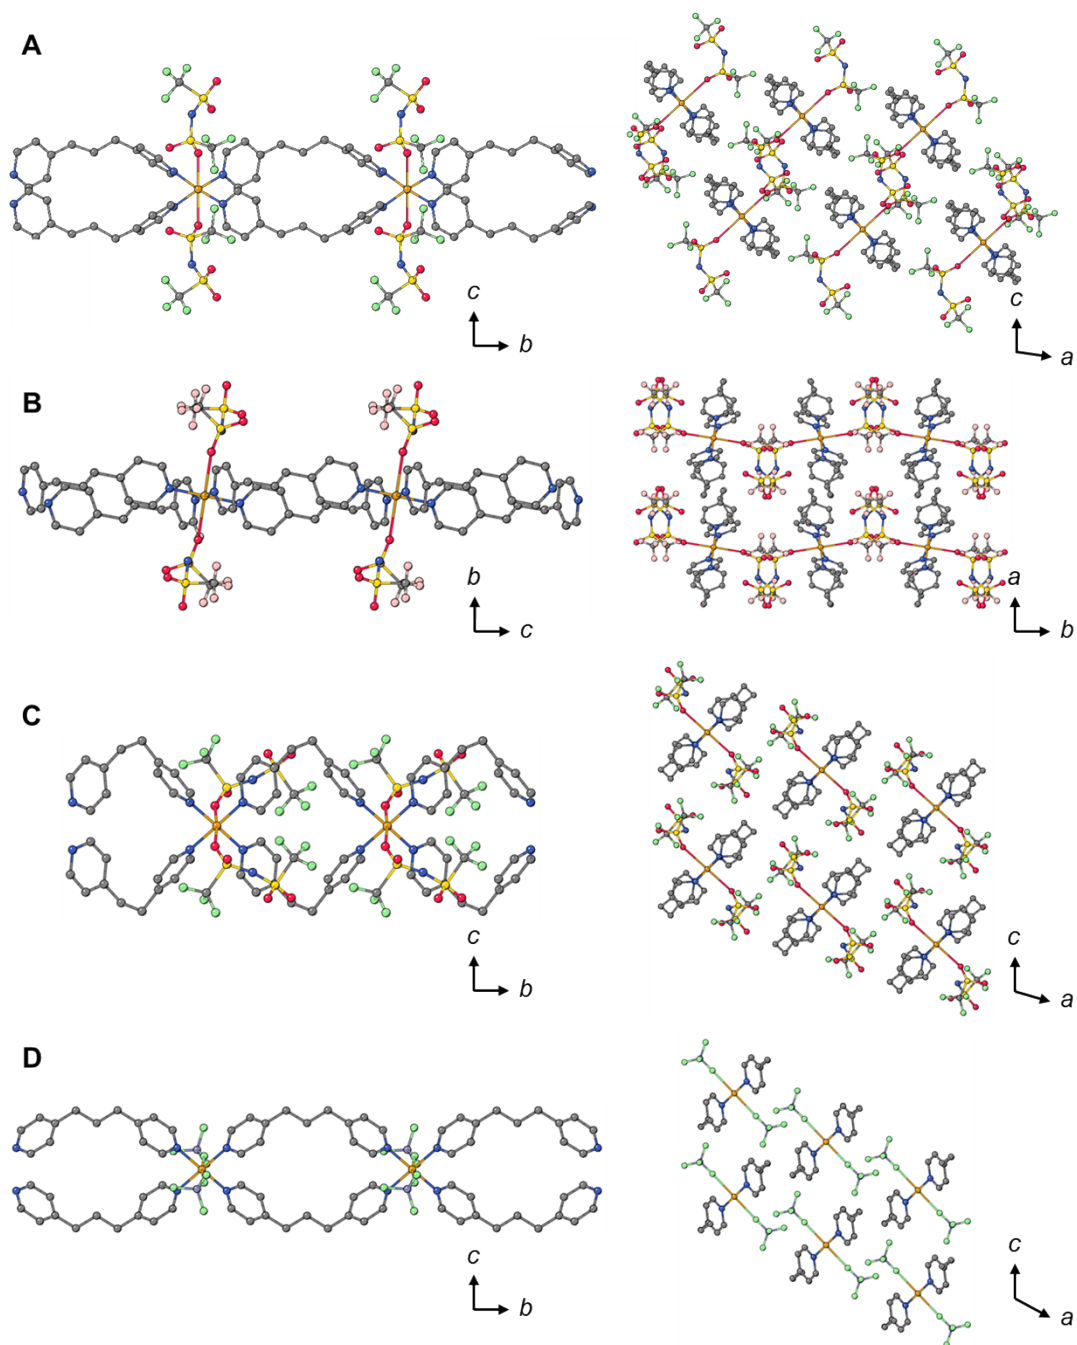

**Figure S2.** Crystal structure of the one-dimensional ribbon-chain and 3D packing structure of (A)  $\text{Cu}(\text{TFSI})_2(\text{bpp})_2$ , (B)  $\text{Cu}(\text{Ms}_2\text{N})_2(\text{bpp})_2$  (C)  $\text{Cu}(\text{TFSI})_2(\text{bpe})_2$ . (D)  $\text{Cu}(\text{BF}_4)_2(\text{bpp})_2$ . Orange, grey, blue, red, green, yellow, and purple spheres represent Cu, C, N, O, F, S and B atoms, respectively. H atoms have been omitted for clarity except for that of  $\text{Ms}_2\text{N}^-$  in  $\text{Cu}(\text{Ms}_2\text{N})_2(\text{bpp})_2$ .

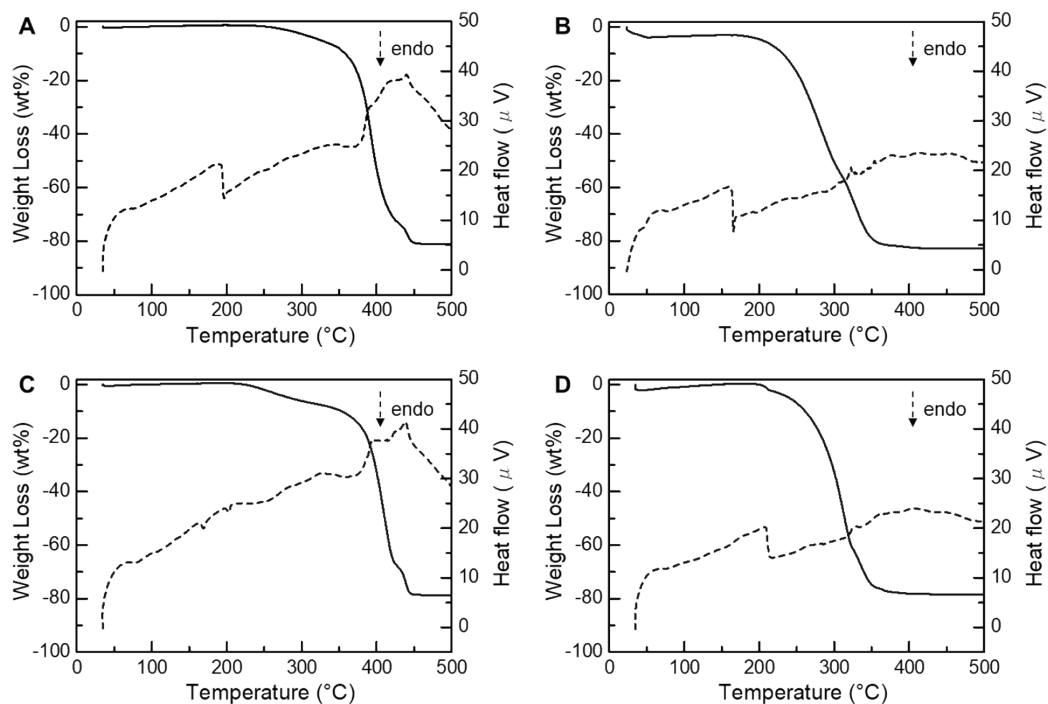

**Figure S3.** TG-DTA profiles of (A)  $\text{Cu}(\text{TFSI})_2(\text{bpp})_2$ , (B)  $\text{Cu}(\text{Ms}_2\text{N})_2(\text{bpp})_2$ , (C)  $\text{Cu}(\text{TFSI})_2(\text{bpe})_2$ , and (D)  $\text{Cu}(\text{BF}_4)_2(\text{bpp})_2$ .

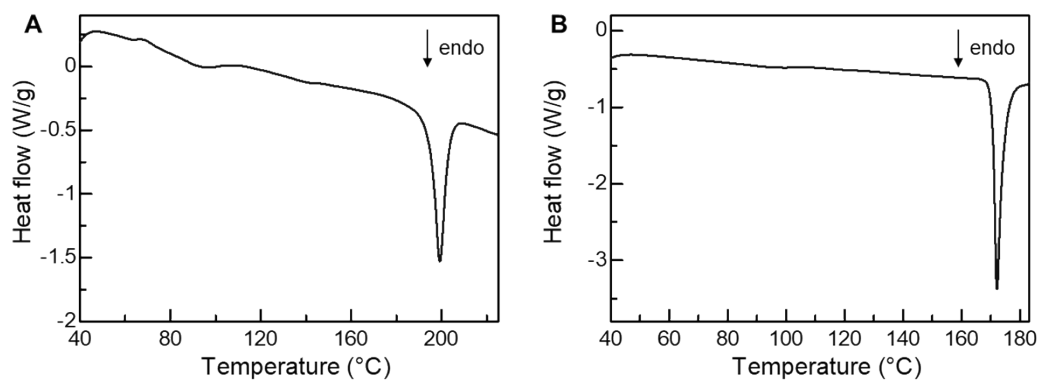

**Figure S4.** DSC profiles of (A)  $\text{Cu}(\text{TFSI})_2(\text{bpp})_2$  and (B)  $\text{Cu}(\text{Ms}_2\text{N})_2(\text{bpp})_2$ .



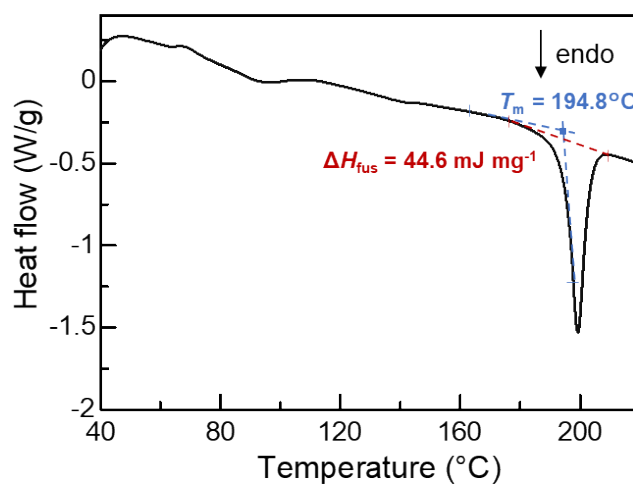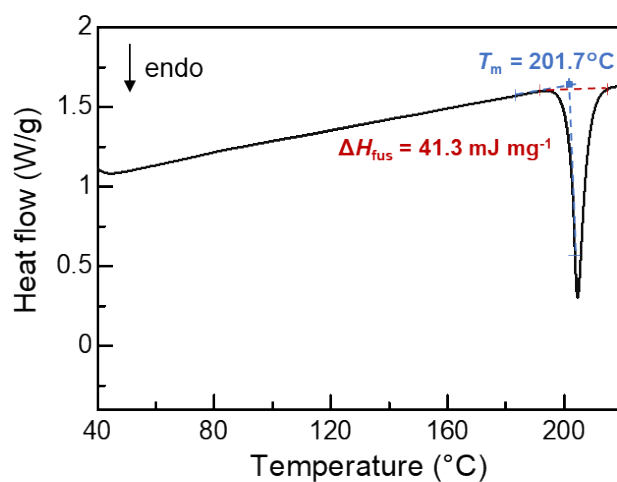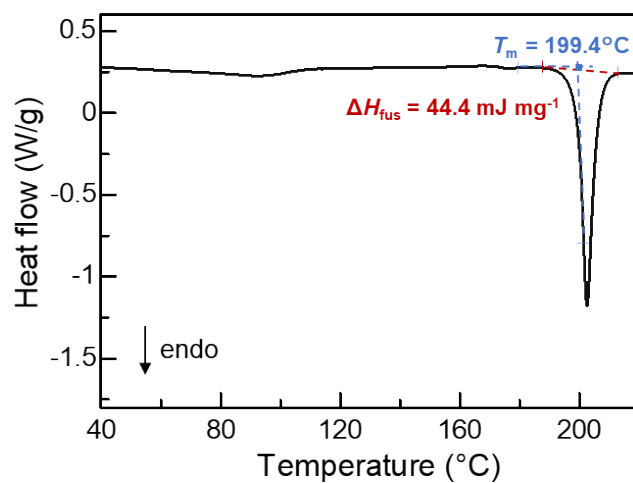

**Figure S5.** DSC profiles of  $\text{Cu}(\text{TFSI})_2(\text{bpp})_2$  and determination of  $T_m$  and  $\Delta H_{\text{fus}}$ . Measurements were conducted three times.

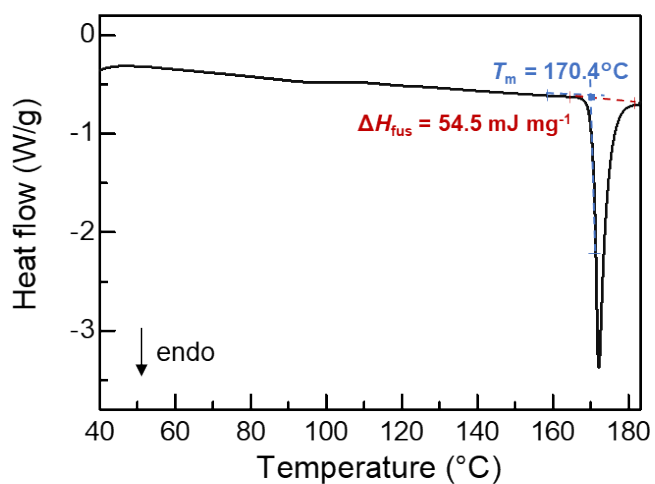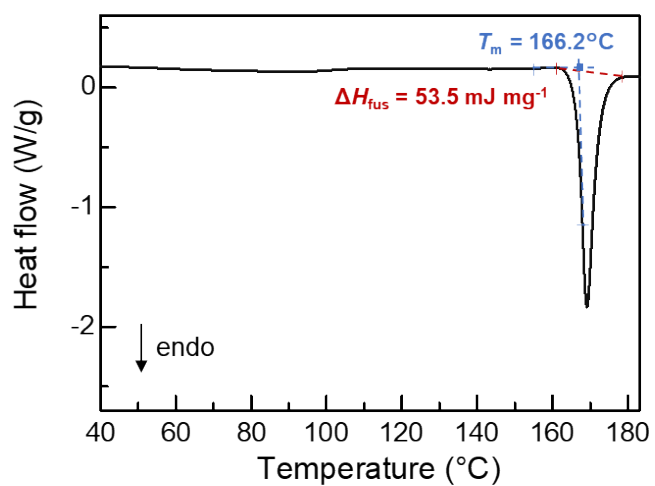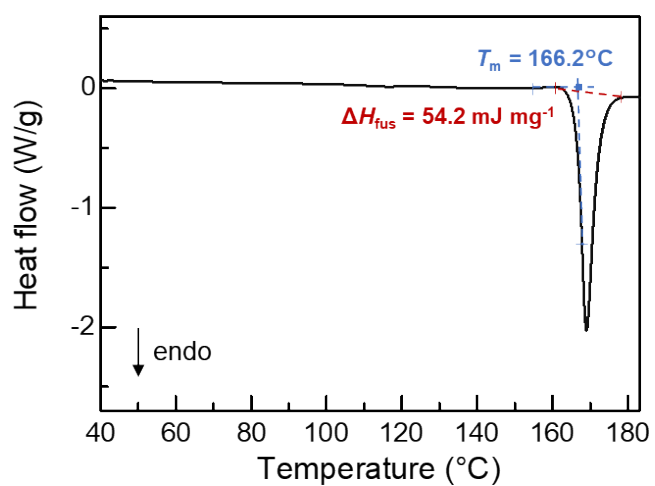

**Figure S6.** DSC profiles of  $\text{Cu}(\text{Ms}_2\text{N})_2(\text{bpp})_2$  and determination of  $T_m$  and  $\Delta H_{\text{fus}}$ . Measurements were conducted three times.

**Table S3.**  $T_m$ ,  $\Delta H_{\text{fus}}$ , and  $\Delta S_{\text{fus}}$  for  $\text{Cu}(\text{TFSI})_2(\text{bpp})_2$  and  $\text{Cu}(\text{Ms}_2\text{N})_2(\text{bpp})_2$  determined by DSC measurements.

| <b>Compound</b>                                                    |             | $T_m / ^\circ\text{C}$ | $\Delta H_{\text{fus}}$<br>/ $\text{mJ mg}^{-1}$ | $\Delta H_{\text{fus}}$<br>/ $\text{kJ mol}^{-1}$ | $\Delta S_{\text{fus}}$<br>/ $\text{J mol}^{-1} \text{K}^{-1}$ |
|--------------------------------------------------------------------|-------------|------------------------|--------------------------------------------------|---------------------------------------------------|----------------------------------------------------------------|
| <b><math>\text{Cu}(\text{TFSI})_2(\text{bpp})_2</math></b>         | Meas. 1     | 194.8                  | 44.6                                             | 45.5                                              | 97.3                                                           |
|                                                                    | Meas. 2     | 201.7                  | 41.3                                             | 42.1                                              | 88.7                                                           |
|                                                                    | Meas. 3     | 199.4                  | 44.4                                             | 45.3                                              | 95.9                                                           |
|                                                                    | <b>Ave.</b> | <b>198.6</b>           | <b>43.4</b>                                      | <b>44.3</b>                                       | <b>94.0</b>                                                    |
|                                                                    | S.D.        | 2.9                    | 1.5                                              | 1.5                                               | 3.7                                                            |
| <b><math>\text{Cu}(\text{Ms}_2\text{N})_2(\text{bpp})_2</math></b> | Meas. 1     | 170.4                  | 54.5                                             | 43.8                                              | 98.8                                                           |
|                                                                    | Meas. 2     | 166.2                  | 53.5                                             | 43.0                                              | 98.0                                                           |
|                                                                    | Meas. 3     | 166.2                  | 54.2                                             | 43.6                                              | 99.2                                                           |
|                                                                    | <b>Ave.</b> | <b>167.6</b>           | <b>54.1</b>                                      | <b>43.5</b>                                       | <b>98.7</b>                                                    |
|                                                                    | S.D.        | 2.0                    | 0.4                                              | 0.3                                               | 0.5                                                            |

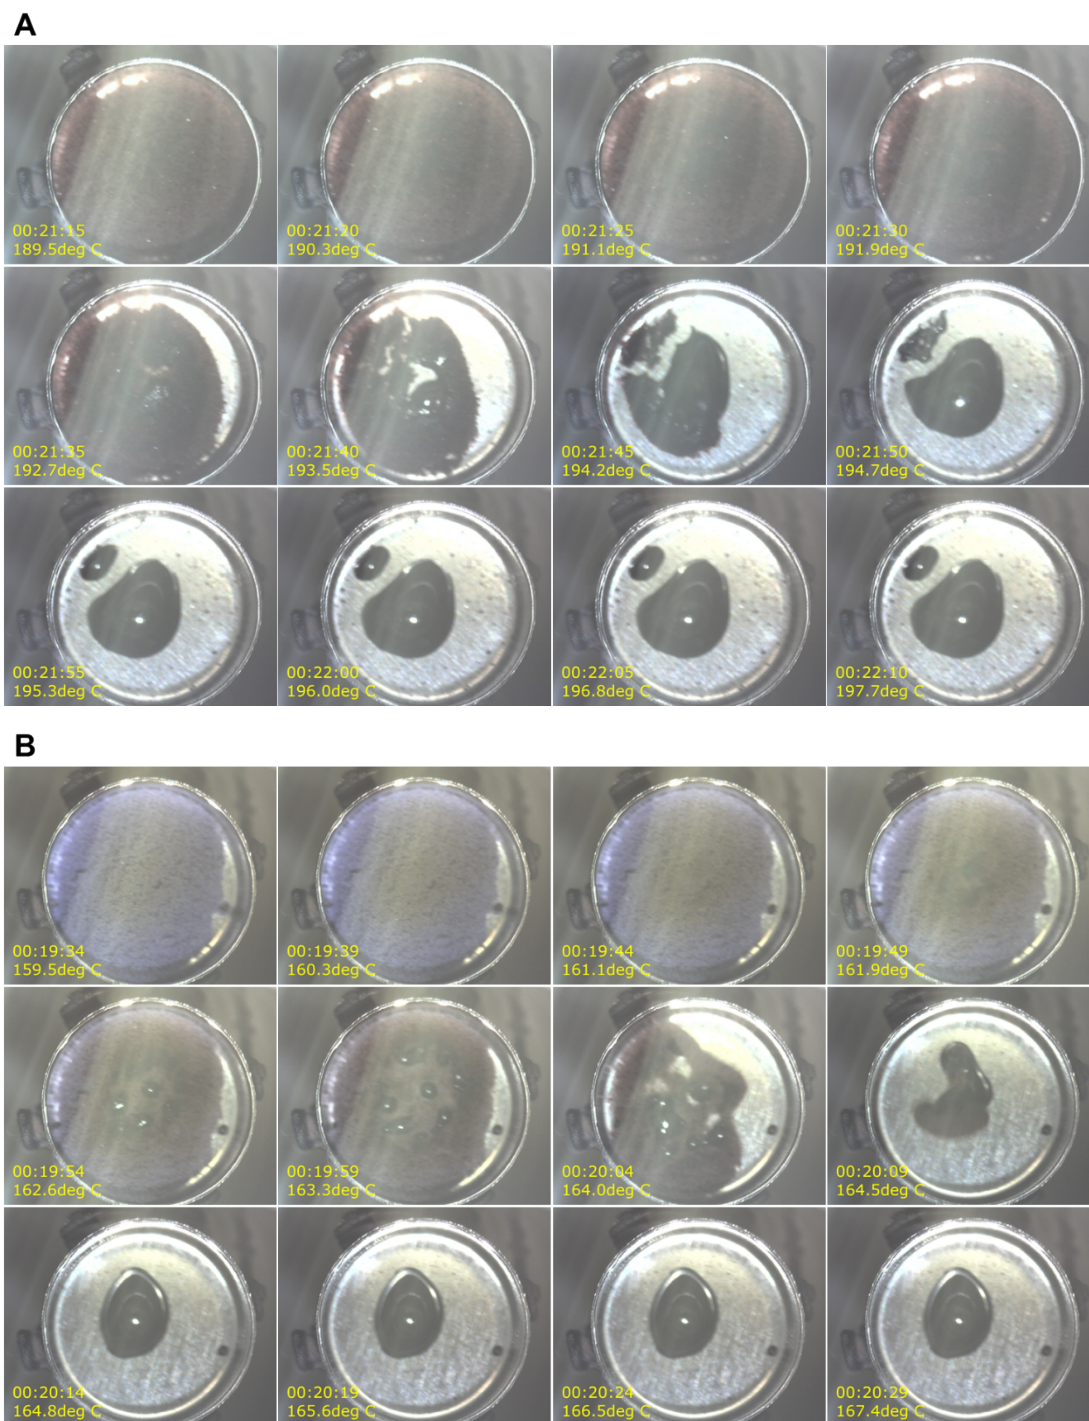

**Figure S7.** Microscope images of melting in TG-DTA measurement of (A)  $\text{Cu}(\text{TFSI})_2(\text{bpp})_2$  and (B)  $\text{Cu}(\text{Ms}_2\text{N})_2(\text{bpp})_2$ .

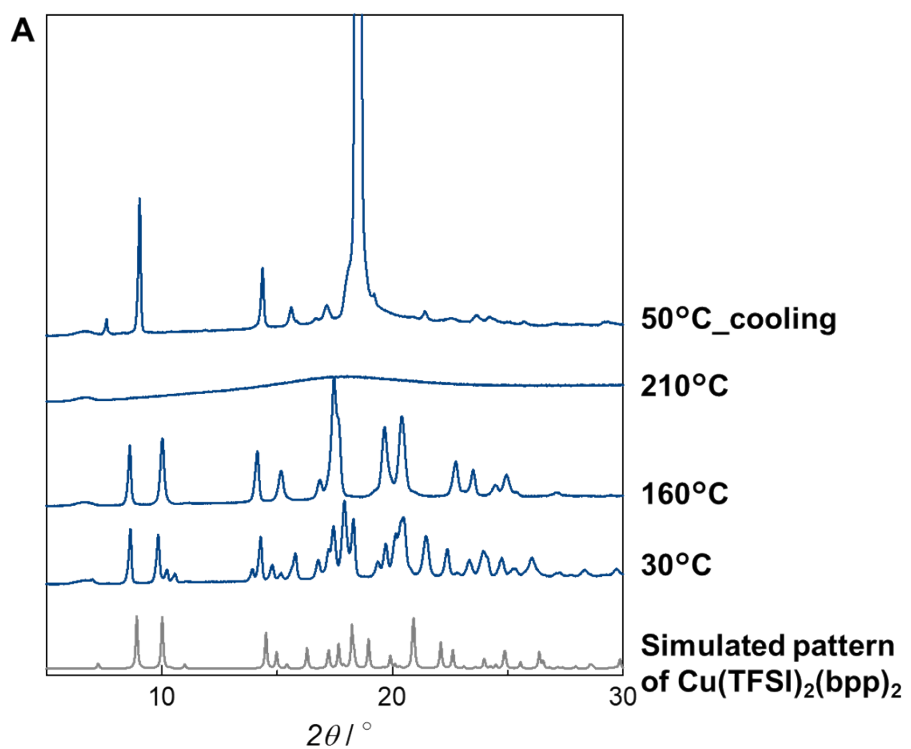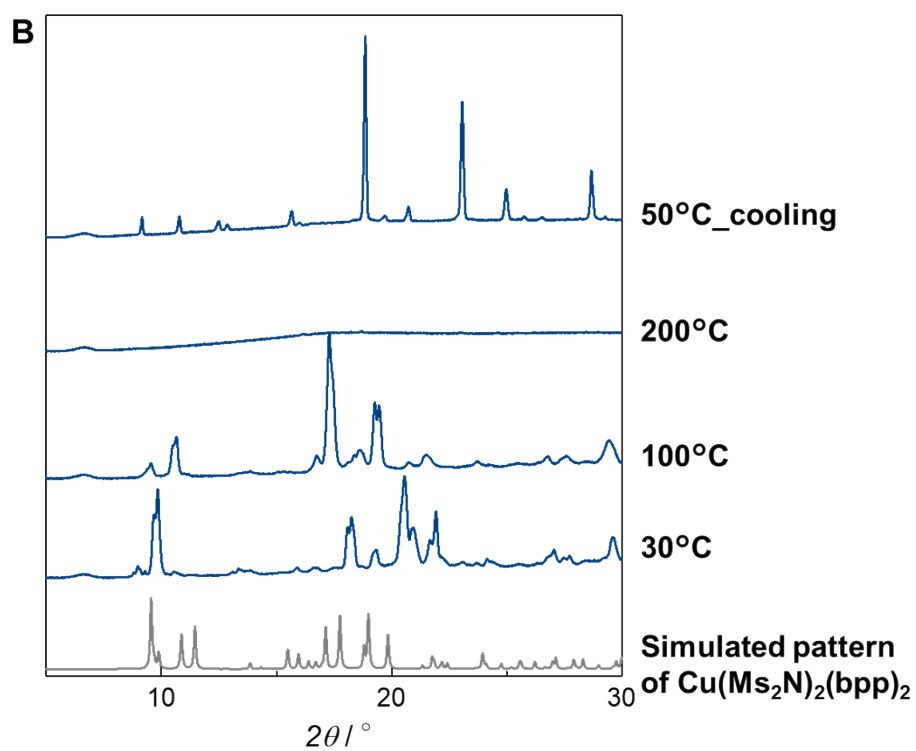

**Figure S8.** VT-PXRD patterns of (A)  $\text{Cu}(\text{TFSI})_2(\text{bpp})_2$  and (B)  $\text{Cu}(\text{Ms}_2\text{N})_2(\text{bpp})_2$ .

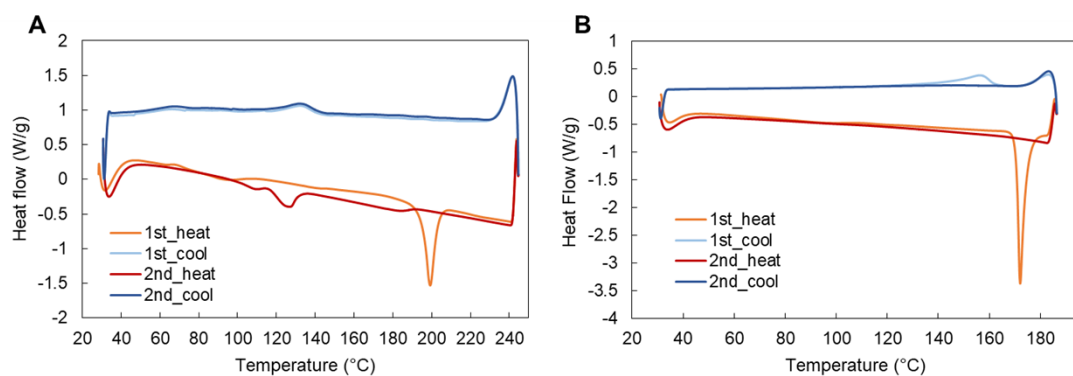

**Figure S9.** DSC profile with cooling and 2nd heating branches of (A)  $\text{Cu}(\text{TFSI})_2(\text{bpp})_2$  and (B)  $\text{Cu}(\text{Ms}_2\text{N})_2(\text{bpp})_2$ .

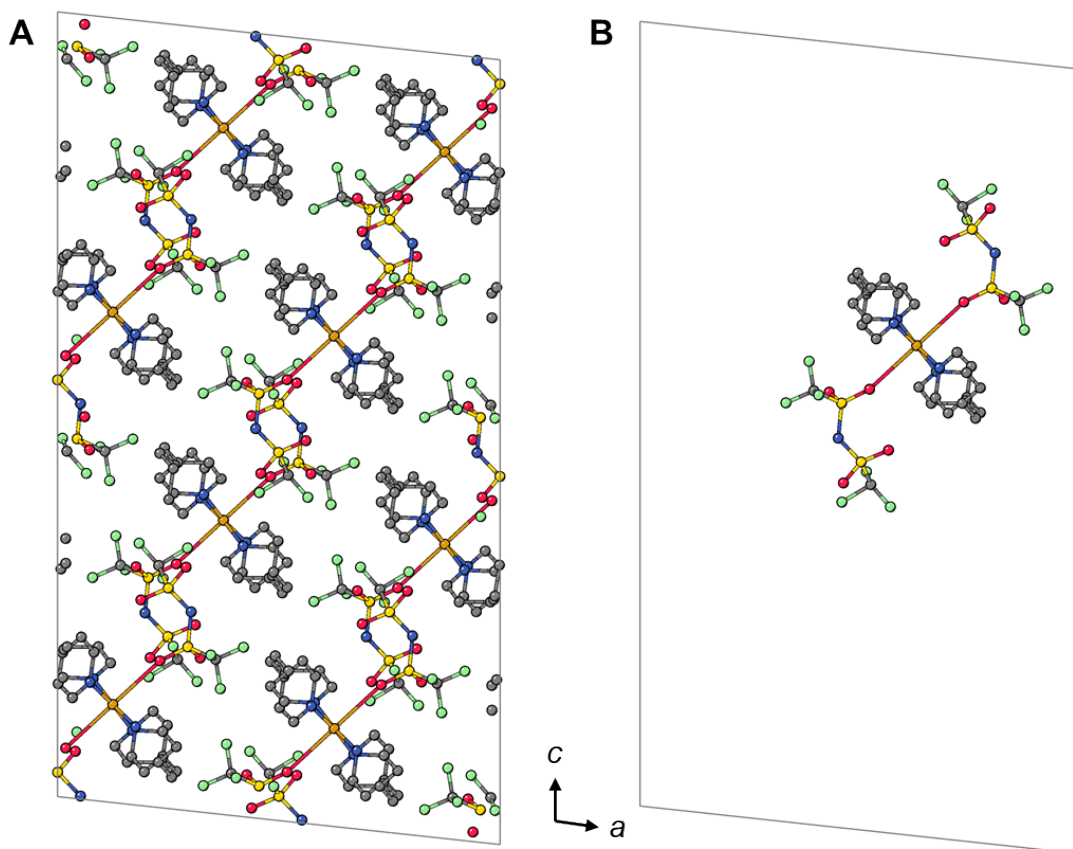

**Figure S10.** Simulation cell of (A) crystal and (B) isolated 1D chain in a 2 2 2 supercell in the  $E_{\text{chain-chain}}$  calculations of  $\text{Cu}(\text{TFSI})_2(\text{bpp})_2$ .

**Table S4.** Calculated values  $E_{\text{chain}}$ ,  $E_{\text{crystal}}$  and  $E_{\text{chain-chain}}$  in each compound.

|                                             | $\text{Cu}(\text{TFSI})_2(\text{bpp})_2$ | $\text{Cu}(\text{Ms}_2\text{N})_2(\text{bpp})_2$ | $\text{Cu}(\text{TFSI})_2(\text{bpe})_2$ | $\text{Cu}(\text{TFSI})_2(\text{BF}_4)_2$ |
|---------------------------------------------|------------------------------------------|--------------------------------------------------|------------------------------------------|-------------------------------------------|
| $E_{\text{chain}}/\text{eV}$                | -1018.997                                | -1035.912                                        | -954.883                                 | -826.325                                  |
| $E_{\text{crystal}}/\text{eV}$              | -8196.475                                | -8345.887                                        | -7681.954                                | -6649.614                                 |
| $E_{\text{chain-chain}}/\text{kJ mol}^{-1}$ | -268.3                                   | -353.3                                           | -258.7                                   | -235.3                                    |

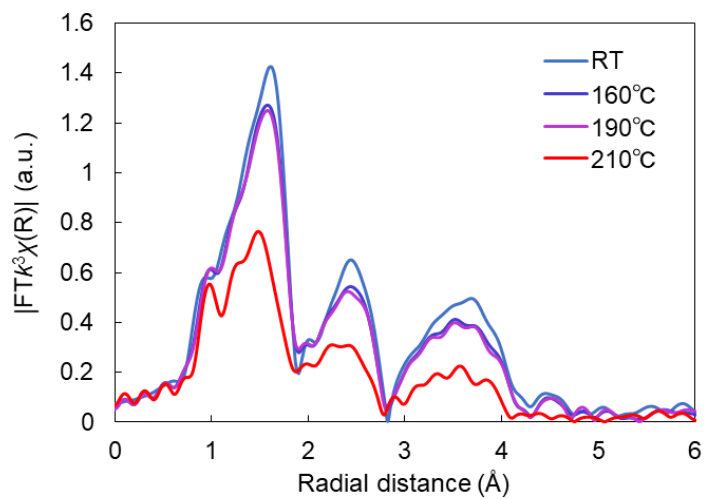

**Figure S11.** VT-RDF profiles of  $\text{Cu}(\text{TFSI})_2(\text{bpp})_2$ .



## References

1. X. Zheng, K. Fukuhara, Y. Hijikata, J. Pirillo, H. Sato, K. Takahashi and S. Noro, *Commun. Chem.* 2020, **3**, 143.
2. T. Suzuki, R. Kotani, A. Kondo and K. Maeda, *J. Phys. Chem. C*, 2016, **120**, 21571–21579.
3. G. M. Sheldrick, SHELXT—Integrated space-group and crystal-structure determination. *Acta Cryst.* 2015, **A71**, 3–8.
4. G. M. Sheldrick, Crystal structure refinement with SHELXL. *Acta Cryst.* 2015, **C71**, 3–8.
5. B. Ravel and M. Newville, *J. Synchrotron Radiat.* 2005, **12**, 537-541.
6. G. Kresse and J. Furthmuller, *Phys. Rev. B: Condens. Matter Mater. Phys.*, 1996, **54**, 11169–11186.
7. G. Kresse and D. Joubert, *Phys. Rev. B: Condens. Matter Mater. Phys.*, 1999, **59**, 1758–1775.
8. I. Hamada, *Phys. Rev. B: Condens. Matter Mater. Phys.*, 2014, **89**, 121103.
9. Y. L. Wang, B. Li, S. Sarman, F. Mocci, Z. Y. Lu, J. Yuan, A. Laaksonen and M. D. Fayer, *Chem. Rev.*, 2020, **120**, 5798–5877.
